# Supplementary material
Source: PubMed Central journal article supplement (PMC3553741)
Supplement: AAC.02052-12_zac999101562so2.pdf [file AAC.02052-12_zac999101562so2.pdf]

1 **Supplemental tables**

2

3 TABLE S1. Cross-resistance profile of GS-9669 and other reference NS5B inhibitors against non-Thumb Site  
4 II NS5B mutations

| Compound                               | EC <sub>50</sub> (nM) <sup>a,b</sup> | Fold resistance <sup>c</sup> against NS5B mutant: |       |       |             |
|----------------------------------------|--------------------------------------|---------------------------------------------------|-------|-------|-------------|
|                                        | WT (1b)                              | S282T                                             | M414T | P495L | Y448H/Y452H |
| GS-9669                                | 11 ± 1.9                             | 0.7                                               | 2     | 1.3   | 1           |
| Lomibuvir                              | 11 ± 3.0                             | 0.8                                               | 2.8   | 2     | 0.9         |
| Filibuvir                              | 80 ± 28                              | 0.7                                               | 0.9   | 3.3   | 0.9         |
| 2'-C-Me-A                              | 206 ± 86                             | 25                                                | 1.2   | 1.1   | 0.5         |
| Benzothiadiazine Palm Site I inhibitor | 370 ± 50                             | NT <sup>d</sup>                                   | >15   | NT    | NT          |
| Benzimidazole Thumb Site I inhibitor   | 344 ± 102                            | NT                                                | NT    | >14   | NT          |
| Tegobuvir                              | 1.5 ± 0.8                            | 0.7                                               | NT    | NT    | 231         |

5 <sup>a</sup> 96-well assay manual format.

6 <sup>b</sup> EC<sub>50</sub>s are the arithmetic mean of at least two experiments.

7 <sup>c</sup> Resistance fold is calculated as the ratio of mutant EC<sub>50</sub> to wild-type EC<sub>50</sub>.

8 <sup>d</sup> NT=Not Tested.

9

10 TABLE S2. Cross-resistance profile of GS-9669 and other reference inhibitors against NS3 and NS5A  
11 resistance mutations

| Compound    | EC <sub>50</sub> (nM) <sup>a,b</sup> | Fold resistance <sup>c</sup> against mutant: |           |           |
|-------------|--------------------------------------|----------------------------------------------|-----------|-----------|
|             | WT (1b)                              | NS3 R155K                                    | NS3 D168V | NS5A Y93H |
| GS-9669     | 11 ± 1.9                             | 0.8                                          | 1         | 1.3       |
| Lomibuvir   | 11 ± 3.0                             | 1.1                                          | 1.4       | 2.0       |
| Filibuvir   | 80 ± 28                              | 1.1                                          | 0.9       | 3.3       |
| 2'-C-Me-A   | 206 ± 86                             | 1.1                                          | 0.7       | 1.1       |
| BILN-2061   | 1.7 ± 1.0                            | 1,981                                        | 3,137     | NT        |
| Daclatasvir | 0.003 ± 0.001                        | NT <sup>d</sup>                              | NT        | 32        |

12 <sup>a</sup> 96-well assay manual format.

13 <sup>b</sup> EC<sub>50</sub>s are the arithmetic mean of at least two experiments.

14 <sup>c</sup> Resistance fold is calculated as the ratio of mutant EC<sub>50</sub> to wild-type EC<sub>50</sub>.

15 <sup>d</sup> NT=Not Tested.

16
